# Supplementary material for: Suppression of genetic recombination in the pseudoautosomal region and at subtelomeres in mice with a hypomorphic Spo11 allele
Source: PubMed Central journal article supplement (PMC3729819; doi:10.1186/1471-2164-14-493), 2013-07-22

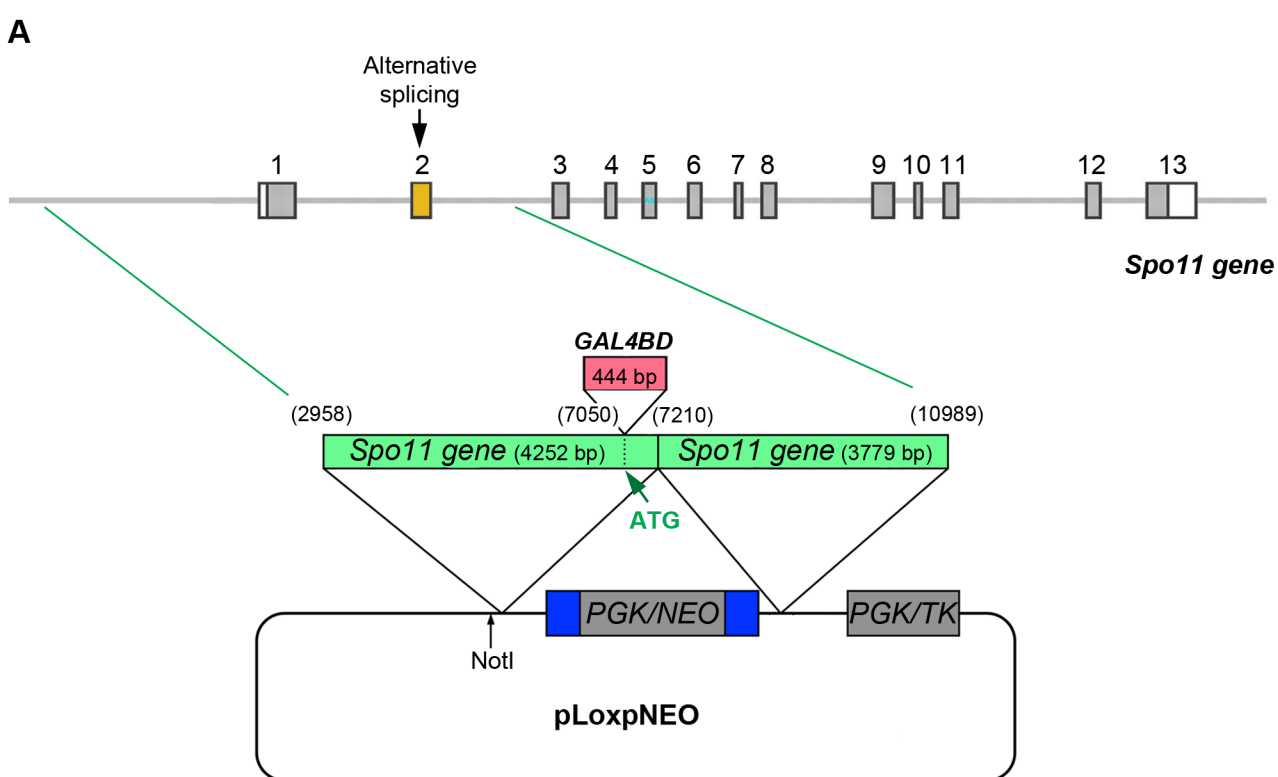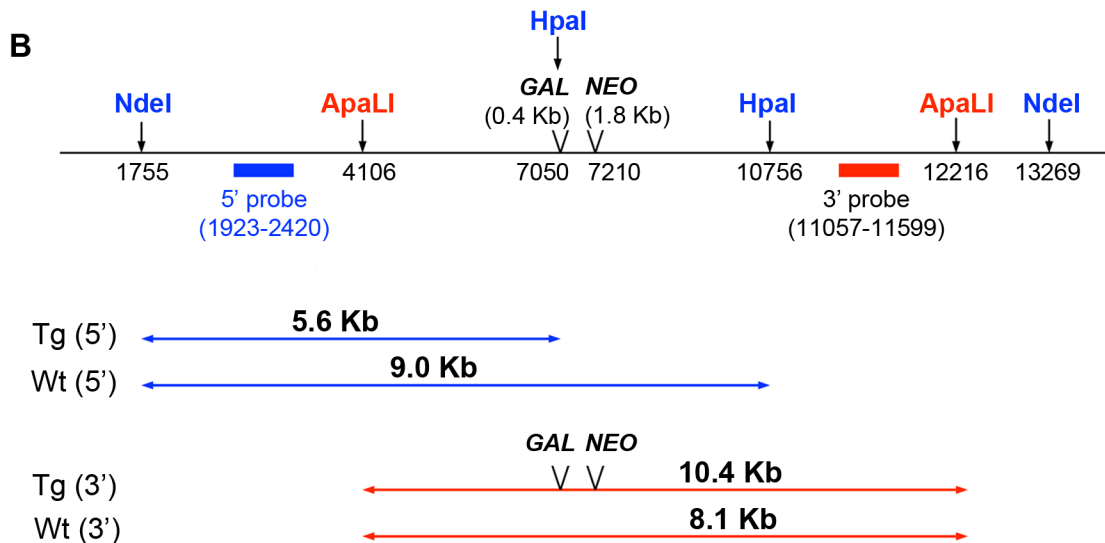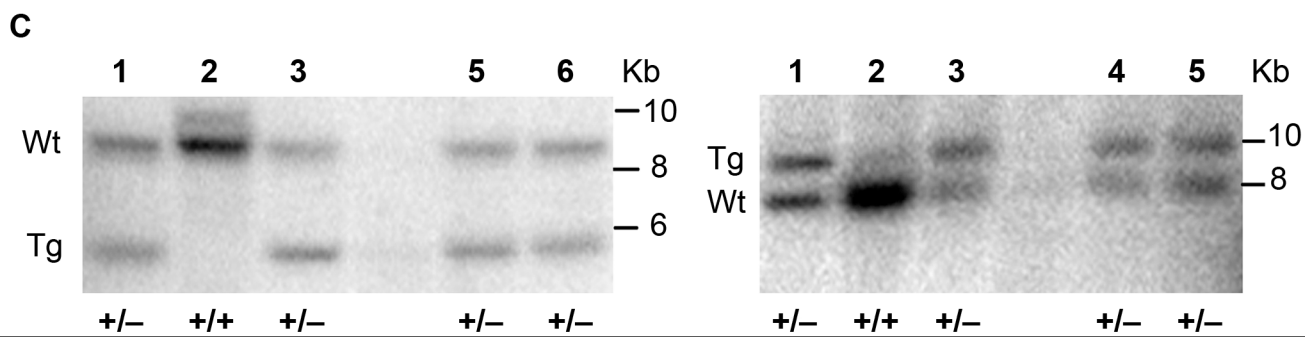

Supplement: 1471-2164-14-493-S1.pdf [file 1471-2164-14-493-S1.pdf]
